# Supplementary material for: Reactive Oxygen Species Mediate the Suppression of Arterial Smooth Muscle T-type Ca2+ Channels by Angiotensin II
Source: PubMed Central journal article supplement (PMC5823855; doi:10.1038/s41598-018-21899-5), 2018-02-22
Supplement: 41598_2018_21899_MOESM1_ESM.pdf [file 41598_2018_21899_MOESM1_ESM.pdf]

# Reactive Oxygen Species Mediate the Suppression of Arterial Smooth Muscle T-type Ca<sup>2+</sup> Channels by Angiotensin II

Ahmed M. Hashad <sup>1</sup>, Maria Sancho <sup>2</sup>, Suzanne E. Brett<sup>2</sup>, Donald G. Welsh <sup>1, 2</sup>

<sup>1</sup>Dept. of Physiology & Pharmacology, Hotchkiss Brain and Libin Cardiovascular Institutes, University of Calgary, Alberta, Canada.

<sup>2</sup>Dept. Physiology & Pharmacology, University of Western Ontario, London, Ontario, Canada.

## Correspondence to:

Donald G. Welsh

Dept. Physiology and Pharmacology, Robarts Research Institute

Room 4245C, London, Ontario, Canada. N6A 5B7.

Tel 519-931-5777 ext. 25330

Email: [dwelsh@robarts.ca](mailto:dwelsh@robarts.ca).

Figure I

A

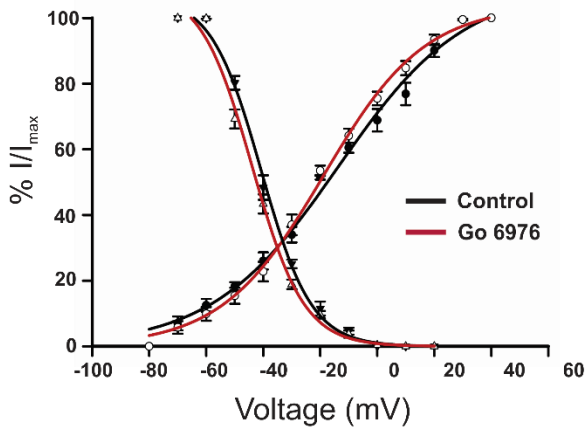

B

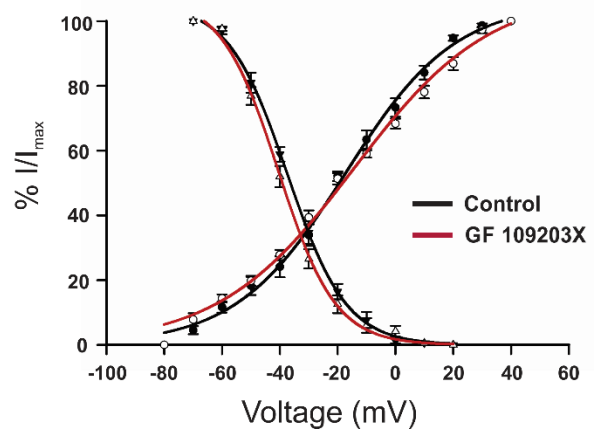

**Supplementary Figure I. Protein Kinase C (PKC) inhibitors do not alter the voltage dependence of activation and steady state inactivation of T-type Ca<sup>2+</sup> channels.** Voltage dependence of activation and steady state inactivation of the whole cell T-type current, prior to and following the application of (A) Go 6976 (conventional PKC inhibitor, 100 nM; n=8) or (B) GF 109203X (non-selective PKC inhibitor, 100 nM; n=9).

Figure II

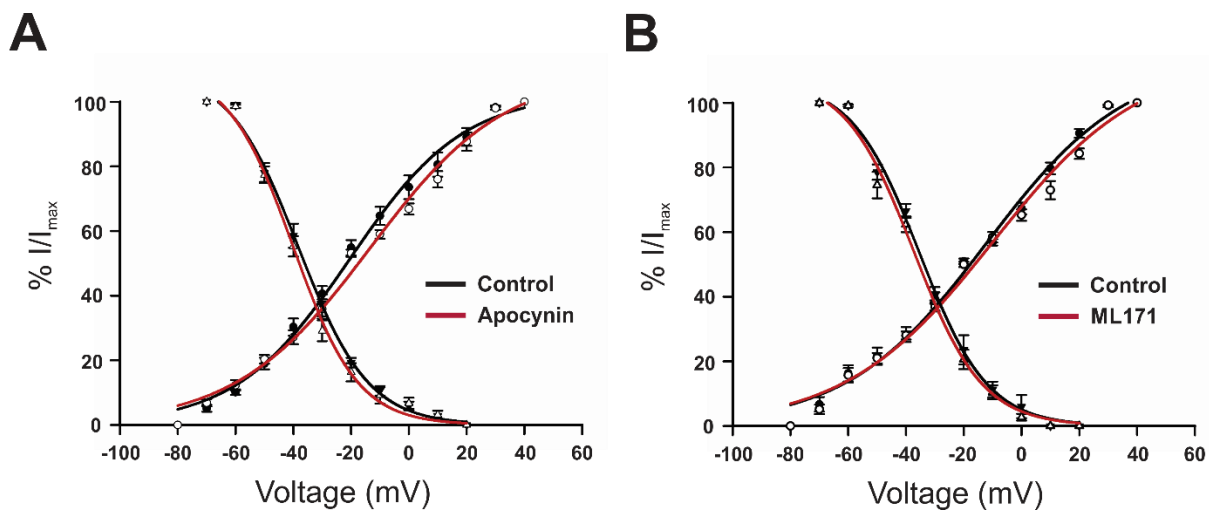

**Supplementary Figure II. NADPH oxidase (Nox) inhibitors do not alter the voltage dependence of activation and steady state inactivation of T-type Ca<sup>2+</sup> channels.** Voltage dependence of activation and steady state inactivation of the whole cell T-type current, prior to and following the application of (A) apocynin (non-selective Nox inhibitor, 50 nM; n=7) or (B) ML171 (selective Nox 1 inhibitor, 1  $\mu$ M) (n=7).

Figure III

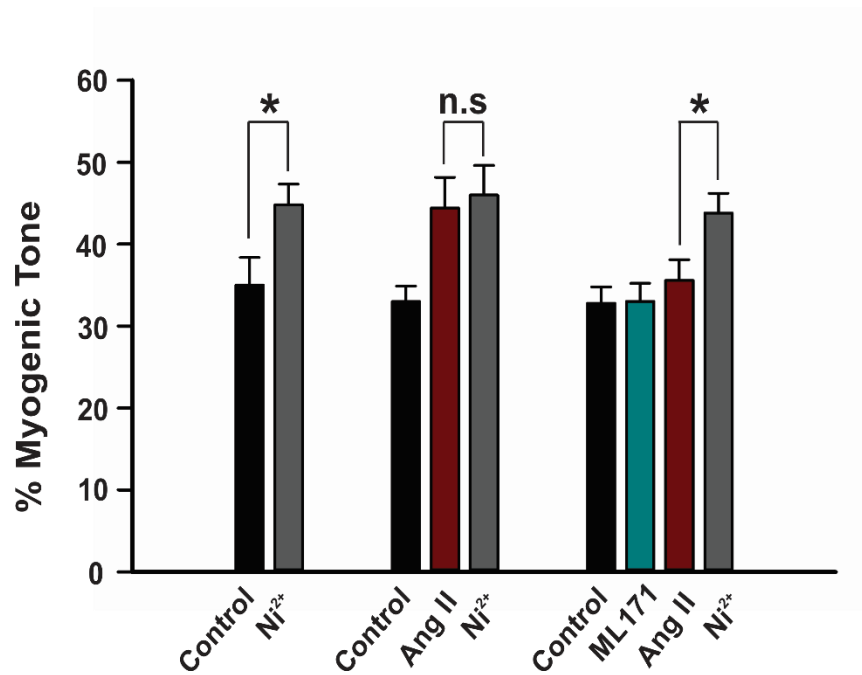

**Supplementary Figure III. An NADPH oxidase (Nox) inhibitor restores the Ni<sup>2+</sup> mediated augmentation of myogenic tone in vessels pretreated with Ang II.** Summary data comparing the effect of Ni<sup>2+</sup> on myogenic tone (60 mmHg) in absence (n=5) and presence (n=5) of the Nox1 inhibitor ML171. Ni<sup>2+</sup> failed to alter arterial tone in vessels pretreated with Ang II, a phenomenon reversed with Nox1 inhibition with ML171 (1 μM) (n=5). \* denotes significant difference (\*P<0.05, paired t test).

Figure IV

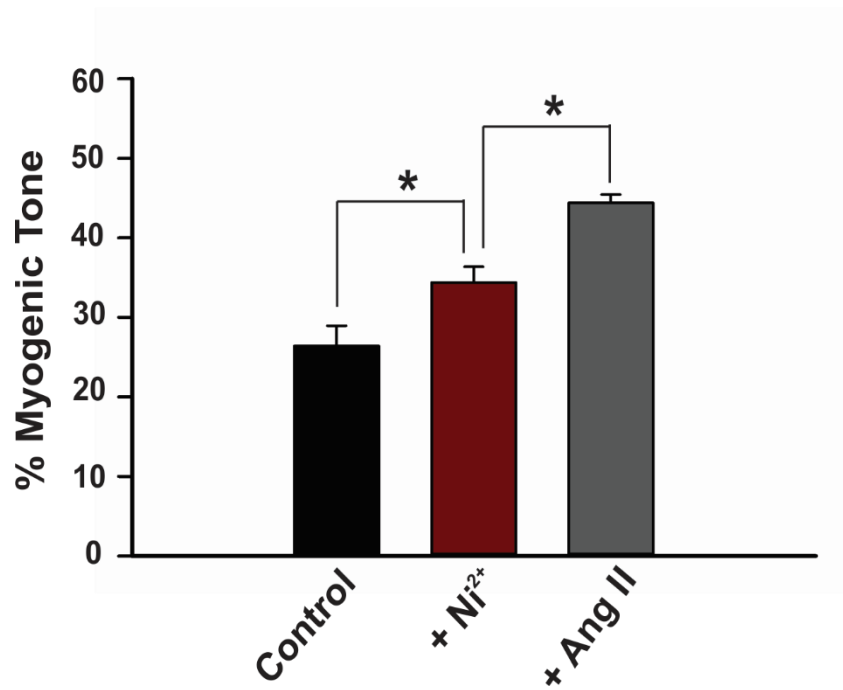

**Supplementary Figure IV. Ang II constricted cerebral arteries preincubated with Ni<sup>2+</sup>.** Summary data highlighting the responsiveness of isolated arteries to Ang II (100 nM) under conditions in which Cav3.2 is blocked by Ni<sup>2+</sup> (50  $\mu$ M). Arteries (n=5) were pressurized to 60 mmHg. \* denotes significant difference (\*P<0.05, paired t test).
